# Supplementary material for: The activated reaction of dichlorocarbene with triplet molecular oxygen
Source: Royal Society of Chemistry journal article supplement (doi:10.1039/d2cp03889g), 2022-01-01
Supplement: d2cp03889g1.pdf [file d2cp03889g1.pdf]

- Supporting Information -

## The Activated Reaction of Dichlorocarbene with Triplet Molecular Oxygen

*J. Philipp Wagner\**

Institut für Organische Chemie, Eberhard Karls Universität Tübingen, Auf der Morgenstelle 18,  
72076 Tübingen

\*Email: [Philipp.wagner@orgchem.uni-tuebingen.de](mailto:Philipp.wagner@orgchem.uni-tuebingen.de)

### Table of Contents

|                                                                                           |     |
|-------------------------------------------------------------------------------------------|-----|
| 1. Optimized CCSD(T) Geometries and Energies .....                                        | S2  |
| 2. Optimized CASSCF Geometries and Energies.....                                          | S16 |
| 3. Energies at Other Levels .....                                                         | S24 |
| 4. Correlation of the Oxygen Addition Barrier Heights With the Singlet-Triplet Gaps ..... | S25 |

## 1. Optimized CCSD(T) Geometries and Energies

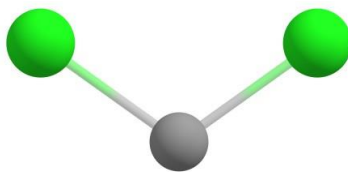

**Figure S1.** Optimized geometry of the  $^1\mathbf{1}$  (in Å) at the CCSD(T)/cc-pVTZ level of theory. The energies are given in units of  $E_h$ .

17 0.000000000 -1.409685000 0.146935000  
6 0.000000000 0.000000000 -0.856360000  
17 0.000000000 1.409685000 0.146935000

|                         | HF             | MP2            | CCSD           | CCSD(T)        | BD(TQ)       |
|-------------------------|----------------|----------------|----------------|----------------|--------------|
| cc-pVDZ                 | -956.7634533   | -957.1506236   | -957.1836938   | -957.1986123   | -957.1988455 |
| cc-pVTZ                 | -956.8060378   | -957.3213668   | -957.3581745   | -957.3868493   | -957.3867113 |
| cc-pVQZ                 | -956.8168706   | -957.3797264   | -957.4122815   | -957.4455353   |              |
| cc-pV5Z                 | -956.8198944   | -957.4030743   | -957.4304256   | -957.4653784   |              |
| CBS limit               | [-956.8210653] | [-957.4255688] | [-957.4474603] | [-957.4841958] |              |
| ZPVE = 0.00415363 $E_h$ |                |                |                |                |              |

FC-CCSD(T)/cc-pCVTZ: -957.39723700489  
AE-CCSD(T)/cc-pCVTZ: -958.121026146216

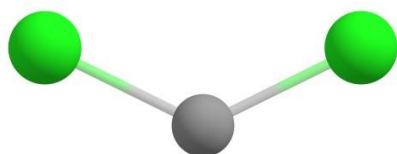

**Figure S2.** Optimized geometry of the  $^31$  (in Å) at the CCSD(T)/cc-pVTZ level of theory. The energies are given in units of  $E_h$ .

```

17  0.000000000  -1.512917000  0.108913000
 6  0.000000000   0.000000000 -0.633020000
17  0.000000000   1.512917000  0.108913000

```

|                         | QRO-HF         | MP2            | CCSD           | CCSD(T)        | (U)BD(TQ)    |
|-------------------------|----------------|----------------|----------------|----------------|--------------|
| cc-pVDZ                 | -956.7633594   | -957.1268160   | -957.1573655   | -957.1683226   | -957.1690504 |
| cc-pVTZ                 | -956.8060062   | -957.2951752   | -957.3313959   | -957.3554542   | -957.3559647 |
| cc-pVQZ                 | -956.8169120   | -957.3523901   | -957.3851872   | -957.4136639   |              |
| cc-pV5Z                 | -956.8201773   | -957.3755544   | -957.4035411   | -957.4336640   |              |
| CBS limit               | [-956.8215728] | [-957.3978274] | [-957.4207673] | [-957.4526173] |              |
| ZPVE = 0.00449644 $E_h$ |                |                |                |                |              |

```

(U)CCSD(T)/cc-pVTZ:  -957.3553544
FC-CCSD(T)/cc-pCVTZ: -957.36644600532
AE-CCSD(T)/cc-pCVTZ: -958.090719019151

```

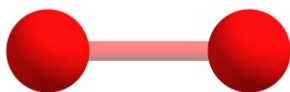

**Figure S3.** Optimized geometry of  ${}^3\text{O}_2$  (in Å) at the CCSD(T)/cc-pVTZ level of theory. The energies are given in units of  $E_h$ .

8 0.000000000 0.000000000 0.606070000  
 8 0.000000000 0.000000000 -0.606070000

|                         | QRO-HF         | MP2            | CCSD           | CCSD(T)        | (U)BD(TQ)    |
|-------------------------|----------------|----------------|----------------|----------------|--------------|
| cc-pVDZ                 | -149.6066634   | -149.9873024   | -149.9748027   | -149.9857423   | -149.9870783 |
| cc-pVTZ                 | -149.6510115   | -150.1275076   | -150.1095890   | -150.1290357   | -150.1290981 |
| cc-pVQZ                 | -149.6623319   | -150.1739260   | -150.1520146   | -150.1738628   |              |
| cc-pV5Z                 | -149.6652394   | -150.1914237   | -150.1661837   | -150.1889739   |              |
| CBS limit               | [-149.6662442] | [-150.2077362] | [-150.1790039] | [-150.2027824] |              |
| ZPVE = 0.00361060 $E_h$ |                |                |                |                |              |

(U)CCSD(T)/cc-pVTZ: -150.1290363  
 FC-CCSD(T)/cc-pCVTZ: -150.136597664944  
 AE-CCSD(T)/cc-pCVTZ: -150.244052466017

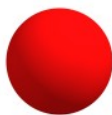

**Figure S4.** Electronic energies of  $^3\text{O}$  atom given in units of  $E_h$ .

|           | QRO-HF        | MP2           | CCSD          | CCSD(T)       | (U)BD(TQ)   |
|-----------|---------------|---------------|---------------|---------------|-------------|
| cc-pVDZ   | -74.7874720   | -74.8940703   | -74.9091433   | -74.9099097   | -74.9101209 |
| cc-pVTZ   | -74.8055722   | -74.9550515   | -74.9708938   | -74.9738680   | -74.9742207 |
| cc-pVQZ   | -74.8107535   | -74.9751410   | -74.9896980   | -74.9934644   |             |
| cc-pV5Z   | -74.8121344   | -74.9827489   | -74.9959292   | -74.9999990   |             |
| CBS limit | [-74.8126361] | [-74.9897839] | [-75.0015198] | [-75.0059079] |             |
| ZPVE = -  |               |               |               |               |             |

(U)CCSD(T)/cc-pVTZ: -74.9739618  
FC-CCSD(T)/cc-pCVTZ: -74.977371733738  
AE-CCSD(T)/cc-pCVTZ: -75.030882682384

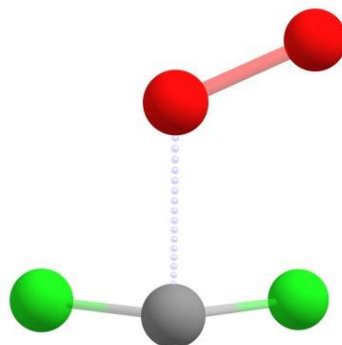

**Figure S5.** Optimized geometry of  ${}^3\text{TS}_{\text{add}}$  (in Å) at the CCSD(T)/cc-pVTZ level of theory. The energies are given in units of  $E_h$ .

|    |              |              |              |
|----|--------------|--------------|--------------|
| 8  | -2.155398000 | -0.840258000 | -0.221280000 |
| 8  | -1.095315000 | -1.346841000 | 0.136647000  |
| 6  | 0.278278000  | 0.043568000  | 0.617283000  |
| 17 | -0.313760000 | 1.515892000  | -0.045089000 |
| 17 | 1.732339000  | -0.505920000 | -0.127309000 |

|                         | QRO-HF          | MP2             | CCSD            | CCSD(T)         | (U)BD(TQ)     |
|-------------------------|-----------------|-----------------|-----------------|-----------------|---------------|
| cc-pVDZ                 | -1106.3176580   | -1107.1070599   | -1107.1373730   | -1107.1668855   | -1107.1678087 |
| cc-pVTZ                 | -1106.4022872   | -1107.4209598   | -1107.4470752   | -1107.5001238   | -1107.4988467 |
| cc-pVQZ                 | -1106.4241215   | -1107.5269459   | -1107.5443529   | -1107.6048948   |               |
| cc-pV5Z                 | -1106.4299386   | -1107.5683908   | -1107.5771428   | -1107.6405569   |               |
| CBS limit               | [-1106.4320513] | [-1107.6078834] | [-1107.6075549] | [-1107.6739824] |               |
| ZPVE = 0.00919654 $E_h$ |                 |                 |                 |                 |               |

(U)CCSD(T)/cc-pVTZ: -1107.4985498  
 FC-CCSD(T)/cc-pCVTZ: -1107.51810452866  
 AE-CCSD(T)/cc-pCVTZ: -1108.34943569184

Optimized geometry of  ${}^3\text{TS}_{\text{add}}$  (in Å) at the CCSD(T)/cc-pVDZ level of theory. The energies are given in units of  $E_h$ .

|    |              |              |              |
|----|--------------|--------------|--------------|
| 8  | -2.150708000 | -0.828153000 | -0.210301000 |
| 8  | -1.081913000 | -1.341570000 | 0.132189000  |
| 6  | 0.264845000  | 0.030239000  | 0.606336000  |
| 17 | -0.333281000 | 1.524326000  | -0.047197000 |
| 17 | 1.747200000  | -0.518404000 | -0.120776000 |

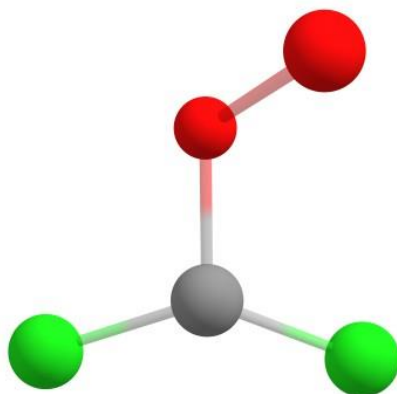

**Figure S6.** Optimized geometry of  ${}^3\text{Cl}_a$  (in Å) at the CCSD(T)/cc-pVTZ level of theory. The energies are given in units of  $E_h$ .

|    |              |              |              |
|----|--------------|--------------|--------------|
| 8  | 0.272646000  | -2.228158000 | 0.369362000  |
| 8  | -0.481461000 | -1.283192000 | -0.217199000 |
| 6  | 0.179306000  | -0.051958000 | -0.093292000 |
| 17 | -0.047090000 | 0.915714000  | -1.485378000 |
| 17 | 0.056875000  | 0.691778000  | 1.450463000  |

|                         | QRO-HF          | MP2             | CCSD            | CCSD(T)         | (U)BD(TQ)     |
|-------------------------|-----------------|-----------------|-----------------|-----------------|---------------|
| cc-pVDZ                 | -1106.4071094   | -1107.1317415   | -1107.1717452   | -1107.1947818   | -1107.1958744 |
| cc-pVTZ                 | -1106.4969876   | -1107.4481895   | -1107.4888252   | -1107.5339338   | -1107.5334273 |
| cc-pVQZ                 | -1106.5188651   | -1107.5535344   | -1107.5868363   | -1107.6389755   |               |
| cc-pV5Z                 | -1106.5248767   | -1107.5949177   | -1107.6200182   | -1107.6748212   |               |
| CBS limit               | [-1106.5271544] | [-1107.6343068] | [-1107.6508025] | [-1107.7084003] |               |
| ZPVE = 0.01179035 $E_h$ |                 |                 |                 |                 |               |

|                      |                   |
|----------------------|-------------------|
| (U)CCSD(T)/cc-pVTZ:  | -1107.5337776     |
| FC-CCSD(T)/cc-pCVTZ: | -1107.55185915468 |
| AE-CCSD(T)/cc-pCVTZ: | -1108.38380361765 |

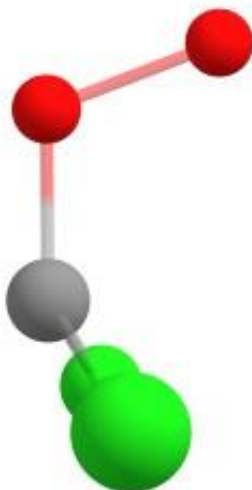

**Figure S7.** Optimized geometry of  ${}^3\text{Cl}_b$  (in Å) at the CCSD(T)/cc-pVTZ level of theory. The energies are given in units of  $E_h$ .

|    |              |              |              |
|----|--------------|--------------|--------------|
| 8  | -1.959684000 | 0.566385000  | -0.000001000 |
| 8  | -1.314765000 | -0.629541000 | 0.000000000  |
| 6  | 0.054463000  | -0.455883000 | 0.000000000  |
| 17 | 0.740225000  | 0.092360000  | 1.470328000  |
| 17 | 0.740224000  | 0.092361000  | -1.470328000 |

|                         | QRO-HF          | MP2             | CCSD            | CCSD(T)         | (U)BD(TQ)     |
|-------------------------|-----------------|-----------------|-----------------|-----------------|---------------|
| cc-pVDZ                 | -1106.4080136   | -1107.1338691   | -1107.1741548   | -1107.1974610   | -1107.1985250 |
| cc-pVTZ                 | -1106.4977612   | -1107.4502124   | -1107.4911335   | -1107.5365633   | -1107.5360251 |
| cc-pVQZ                 | -1106.5195875   | -1107.5555590   | -1107.5891354   | -1107.6416264   |               |
| cc-pV5Z                 | -1106.5255746   | -1107.5969318   | -1107.6223119   | -1107.6774788   |               |
| CBS limit               | [-1106.5278376] | [-1107.6363209] | [-1107.6531017] | [-1107.7110760] |               |
| ZPVE = 0.01172053 $E_h$ |                 |                 |                 |                 |               |

|                      |                   |
|----------------------|-------------------|
| (U)CCSD(T)/cc-pVTZ:  | -1107.5363584     |
| FC-CCSD(T)/cc-pCVTZ: | -1107.55452795885 |
| AE-CCSD(T)/cc-pCVTZ: | -1108.38650843678 |



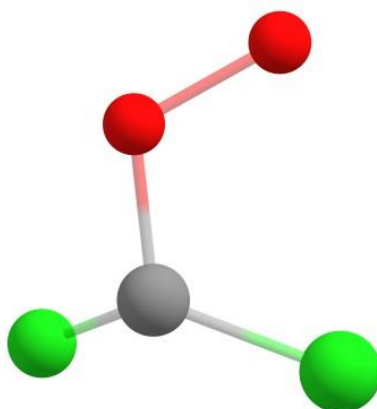

**Figure S8.** Optimized geometry of  ${}^3\text{TS}_{\text{rot}}$  (in Å) at the CCSD(T)/cc-pVTZ level of theory. The energies are given in units of  $E_h$ .

|    |              |              |              |
|----|--------------|--------------|--------------|
| 8  | 1.785490000  | 1.223925000  | -0.219241000 |
| 8  | 0.520216000  | 1.331577000  | 0.176083000  |
| 6  | -0.119316000 | 0.054381000  | 0.383373000  |
| 17 | 0.750152000  | -1.355847000 | -0.017837000 |
| 17 | -1.763813000 | 0.168548000  | -0.093735000 |

|                         | QRO-HF          | MP2             | CCSD            | CCSD(T)         | (U)BD(TQ)     |
|-------------------------|-----------------|-----------------|-----------------|-----------------|---------------|
| cc-pVDZ                 | -1106.3996717   | -1107.1267362   | -1107.1653604   | -1107.1888087   | -1107.1898228 |
| cc-pVTZ                 | -1106.4893936   | -1107.4432689   | -1107.4823376   | -1107.5279108   | -1107.5273121 |
| cc-pVQZ                 | -1106.5112762   | -1107.5488333   | -1107.5805174   | -1107.6331691   |               |
| cc-pV5Z                 | -1106.5173150   | -1107.5903518   | -1107.6138175   | -1107.6691529   |               |
| CBS limit               | [-1106.5196167] | [-1107.6298780] | [-1107.6447212] | [-1107.7028722] |               |
| ZPVE = 0.01158300 $E_h$ |                 |                 |                 |                 |               |

(U)CCSD(T)/cc-pVTZ: -1107.527757  
 FC-CCSD(T)/cc-pCVTZ: -1107.54590567806  
 AE-CCSD(T)/cc-pCVTZ: -1108.37779440201

Optimized geometry of  ${}^3\text{TS}_{\text{rot}}$  (in Å) at the CCSD(T)/cc-pVDZ level of theory. The energies are given in units of  $E_h$ .

|    |              |              |              |
|----|--------------|--------------|--------------|
| 8  | 1.793304000  | 1.228605000  | -0.223915000 |
| 8  | 0.521256000  | 1.338143000  | 0.178307000  |
| 6  | -0.119836000 | 0.055571000  | 0.394927000  |
| 17 | 0.756056000  | -1.369039000 | -0.021099000 |
| 17 | -1.778050000 | 0.169304000  | -0.099576000 |

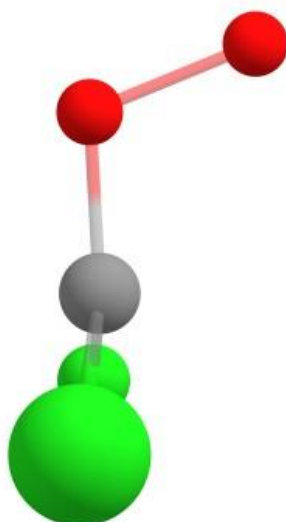

**Figure S9.** Optimized geometry of  ${}^3\text{TS}_{\text{inv}}$  (in Å) at the CCSD(T)/cc-pVTZ level of theory. The energies are given in units of  $E_h$ .

|    |              |              |              |
|----|--------------|--------------|--------------|
| 8  | -2.177064000 | 0.445951000  | -0.001193000 |
| 8  | -1.287325000 | -0.595516000 | 0.002244000  |
| 6  | -0.008376000 | -0.116603000 | 0.000214000  |
| 17 | 0.794680000  | 0.058088000  | 1.483737000  |
| 17 | 0.793899000  | 0.047253000  | -1.485002000 |

|                         | QRO-HF          | MP2             | CCSD            | CCSD(T)         | (U)BD(TQ)     |
|-------------------------|-----------------|-----------------|-----------------|-----------------|---------------|
| cc-pVDZ                 | -1106.3986910   | -1107.1267530   | -1107.1680308   | -1107.1911819   | -1107.1923707 |
| cc-pVTZ                 | -1106.4891237   | -1107.4441753   | -1107.4858745   | -1107.5311142   | -1107.5307118 |
| cc-pVQZ                 | -1106.5111599   | -1107.5497275   | -1107.5839615   | -1107.6362296   |               |
| cc-pV5Z                 | -1106.5173507   | -1107.5912723   | -1107.6172659   | -1107.6721959   |               |
| CBS limit               | [-1106.5197695] | [-1107.6307836] | [-1107.6481316] | [-1107.7058545] |               |
| ZPVE = 0.01078400 $E_h$ |                 |                 |                 |                 |               |

|                      |                   |
|----------------------|-------------------|
| (U)CCSD(T)/cc-pVTZ:  | -1107.5308758     |
| FC-CCSD(T)/cc-pCVTZ: | -1107.54931809346 |
| AE-CCSD(T)/cc-pCVTZ: | -1108.38149474799 |

Optimized geometry of  ${}^3\text{TS}_{\text{inv}}$  (in Å) at the CCSD(T)/cc-pVDZ level of theory. The energies are given in units of  $E_h$ .

|    |              |              |              |
|----|--------------|--------------|--------------|
| 8  | 0.347126000  | -2.215570000 | 0.004111000  |
| 8  | -0.667637000 | -1.264025000 | -0.002232000 |
| 6  | -0.119502000 | -0.012114000 | -0.001267000 |
| 17 | 0.092824000  | 0.800061000  | -1.495762000 |
| 17 | 0.094837000  | 0.795539000  | 1.495149000  |

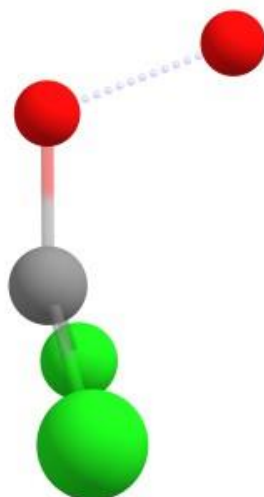

**Figure S10.** Optimized geometry of  ${}^3\text{TS}_{0-o}$  (in Å) at the CCSD(T)/cc-pVTZ level of theory. The energies are given in units of  $E_h$ .

|    |              |              |              |
|----|--------------|--------------|--------------|
| 8  | -2.110133000 | 0.555790000  | 0.000097000  |
| 8  | -1.252937000 | -0.689709000 | -0.000059000 |
| 6  | 0.012159000  | -0.374178000 | -0.000021000 |
| 17 | 0.765571000  | 0.096581000  | -1.466231000 |
| 17 | 0.765471000  | 0.096649000  | 1.466213000  |

|                         | QRO-HF          | MP2             | CCSD            | CCSD(T)         | (U)BD(TQ)     |
|-------------------------|-----------------|-----------------|-----------------|-----------------|---------------|
| cc-pVDZ                 | -1106.3851442   | -1107.1369080   | -1107.1697445   | -1107.1951934   | -1107.1963680 |
| cc-pVTZ                 | -1106.4734087   | -1107.4523916   | -1107.4846546   | -1107.5325152   | -1107.5319850 |
| cc-pVQZ                 | -1106.4950317   | -1107.5575048   | -1107.5820144   | -1107.6370521   |               |
| cc-pV5Z                 | -1106.5009550   | -1107.5986897   | -1107.6149032   | -1107.6726485   |               |
| CBS limit               | [-1106.5031898] | [-1107.6379203] | [-1107.6454297] | [-1107.7060156] |               |
| ZPVE = 0.00990299 $E_h$ |                 |                 |                 |                 |               |

(U)CCSD(T)/cc-pVTZ: -1107.5318482  
 FC-CCSD(T)/cc-pCVTZ: -1107.55040856666  
 AE-CCSD(T)/cc-pCVTZ: -1108.38236716715

Optimized geometry of  ${}^3\text{TS}_{0-o}$  (in Å) at the CCSD(T)/cc-pVDZ level of theory. The energies are given in units of  $E_h$ .

|    |              |              |              |
|----|--------------|--------------|--------------|
| 8  | -2.092306000 | 0.561395000  | -0.000003000 |
| 8  | -1.269230000 | -0.696314000 | 0.000001000  |
| 6  | 0.019064000  | -0.401255000 | 0.000001000  |
| 17 | 0.761300000  | 0.110655000  | -1.477893000 |
| 17 | 0.761302000  | 0.110653000  | 1.477893000  |

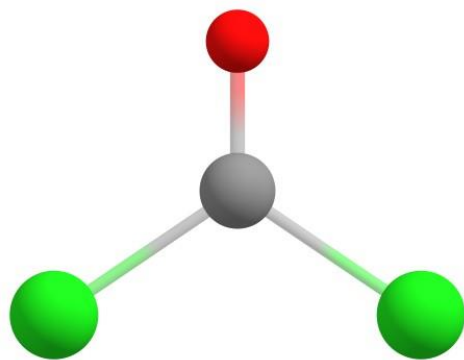

**Figure S11.** Optimized geometry of **phosgene** (in Å) at the CCSD(T)/cc-pVTZ level of theory. The energies are given in units of  $E_h$ .

```

8      0.000000000    0.000000000    1.689510000
6      0.000000000    0.000000000    0.507944000
17     0.000000000    1.451070000   -0.473549000
17     0.000000000   -1.451070000   -0.473549000

```

|                         | HF              | MP2             | CCSD            | CCSD(T)         | BD(TQ)        |
|-------------------------|-----------------|-----------------|-----------------|-----------------|---------------|
| cc-pVDZ                 | -1031.7327041   | -1032.3190120   | -1032.3391733   | -1032.3593130   | -1032.3592427 |
| cc-pVTZ                 | -1031.7995498   | -1032.5630524   | -1032.5853890   | -1032.6236121   | -1032.6223007 |
| cc-pVQZ                 | -1031.8163299   | -1032.6460544   | -1032.6626258   | -1032.7065873   |               |
| cc-pV5Z                 | -1031.8206228   | -1032.6782871   | -1032.6881112   | -1032.7341845   |               |
| CBS limit               | [-1031.8220986] | [-1032.7090768] | [-1032.7118218] | [-1032.7601108] |               |
| ZPVE = 0.01050856 $E_h$ |                 |                 |                 |                 |               |

```

FC-CCSD(T)/cc-pCVTZ:  -1032.63756233569
AE-CCSD(T)/cc-pCVTZ:  -1033.41618003596

```

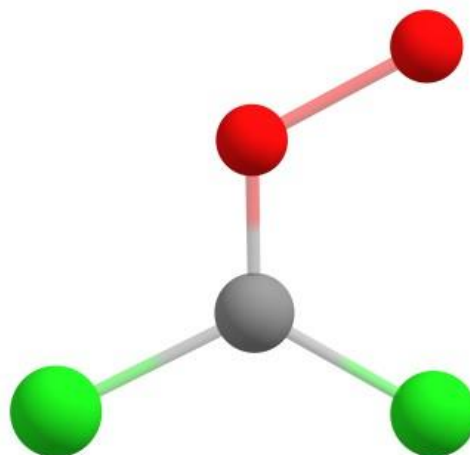

**Figure S12.** Optimized geometry of  ${}^1\text{CI}$  (in  $\text{\AA}$ ) at the CCSD(T)/cc-pVTZ level of theory. The energies are given in units of  $E_h$ .

|    |              |              |             |
|----|--------------|--------------|-------------|
| 8  | -1.903816000 | -1.186421000 | 0.000000000 |
| 8  | -0.544640000 | -1.230144000 | 0.000000000 |
| 6  | 0.091135000  | -0.125765000 | 0.000000000 |
| 17 | -0.701501000 | 1.361212000  | 0.000000000 |
| 17 | 1.790167000  | -0.212700000 | 0.000000000 |

|                         | HF              | MP2             | CCSD            | CCSD(T)         | BD(TQ)        |
|-------------------------|-----------------|-----------------|-----------------|-----------------|---------------|
| cc-pVDZ                 | -1106.3933196   | -1107.1698829   | -1107.1974039   | -1107.2294146   | -1107.2280490 |
| cc-pVTZ                 | -1106.4888510   | -1107.4957581   | -1107.5203741   | -1107.5752619   | -1107.5717546 |
| cc-pVQZ                 | -1106.5123486   | -1107.6051248   | -1107.6209921   | -1107.6831353   |               |
| cc-pV5Z                 | -1106.5190241   | -1107.6483023   | -1107.6552644   | -1107.7201789   |               |
| CBS limit               | [-1106.5216731] | [-1107.6892485] | [-1107.6868674] | [-1107.7546895] |               |
| ZPVE = 0.01296280 $E_h$ |                 |                 |                 |                 |               |

FC-CCSD(T)/cc-pCVTZ: -1107.59350500271  
 AE-CCSD(T)/cc-pCVTZ: -1108.42574896807

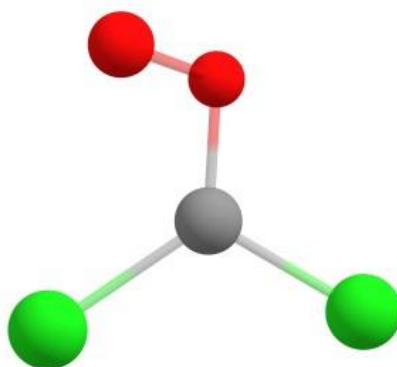

**Figure S13.** Optimized geometry of  ${}^1\text{TS}_{\text{diox}}$  (in Å) at the CCSD(T)/cc-pVTZ level of theory. The energies are given in units of  $E_h$ .

```

8   -1.574528000   1.293728000   0.444253000
8   -0.431674000   1.281861000  -0.519794000
6    0.026624000   0.176701000  -0.133968000
17  -0.809030000  -1.310381000  -0.031558000
17   1.717618000   0.071717000   0.112210000

```

|                         | HF              | MP2             | CCSD            | CCSD(T)         | BD(TQ)        |
|-------------------------|-----------------|-----------------|-----------------|-----------------|---------------|
| cc-pVDZ                 | -1106.3769364   | -1107.1371980   | -1107.1700988   | -1107.2009706   | -1107.1996914 |
| cc-pVTZ                 | -1106.4708371   | -1107.4626869   | -1107.4929520   | -1107.5465984   | -1107.5432968 |
| cc-pVQZ                 | -1106.4937176   | -1107.5714677   | -1107.5931573   | -1107.6541080   |               |
| cc-pV5Z                 | -1106.5000720   | -1107.6142816   | -1107.6272104   | -1107.6909615   |               |
| CBS limit               | [-1106.5025153] | [-1107.6549774] | [-1107.6587146] | [-1107.7254040] |               |
| ZPVE = 0.01147640 $E_h$ |                 |                 |                 |                 |               |

```

FC-CCSD(T)/cc-pCVTZ:  -1107.56470226333
AE-CCSD(T)/cc-pCVTZ:  -1108.39665985948

```

Optimized geometry of  ${}^1\text{TS}_{\text{diox}}$  (in Å) at the CCSD(T)/cc-pVDZ level of theory. The energies are given in units of  $E_h$ .

```

8   -1.600401000   1.309452000   0.448996000
8   -0.428978000   1.285885000  -0.522357000
6    0.030597000   0.178047000  -0.134342000
17  -0.809887000  -1.325321000  -0.031147000
17   1.737678000   0.065564000   0.109992000

```

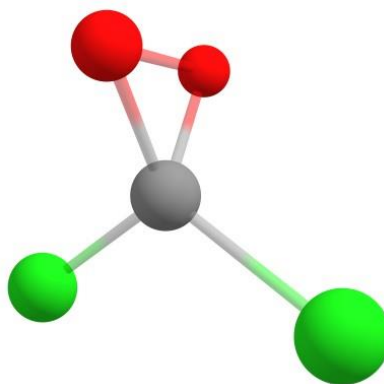

**Figure S14.** Optimized geometry of **13** (in Å) at the CCSD(T)/cc-pVTZ level of theory. The energies are given in units of  $E_h$ .

```

8   -0.774141000   0.000000000  -1.405911000
6   -0.000003000   0.000000000  -0.284130000
8    0.774141000   0.000000000  -1.405905000
17   0.000002000   1.453896000   0.691821000
17   0.000002000  -1.453896000   0.691821000

```

|                         | HF              | MP2             | CCSD            | CCSD(T)         | BD(TQ)        |
|-------------------------|-----------------|-----------------|-----------------|-----------------|---------------|
| cc-pVDZ                 | -1106.4476276   | -1107.2325683   | -1107.2536471   | -1107.2815662   | -1107.2824438 |
| cc-pVTZ                 | -1106.5405867   | -1107.5549393   | -1107.5740867   | -1107.6250517   | -1107.6237613 |
| cc-pVQZ                 | -1106.5621220   | -1107.6615673   | -1107.6725947   | -1107.7307512   |               |
| cc-pV5Z                 | -1106.5679368   | -1107.7032019   | -1107.7057238   | -1107.7665592   |               |
| CBS limit               | [-1106.5700876] | [-1107.7429342] | [-1107.7365322] | [-1107.8001783] |               |
| ZPVE = 0.01345403 $E_h$ |                 |                 |                 |                 |               |

```

FC-CCSD(T)/cc-pCVTZ:  -1107.64255295999
AE-CCSD(T)/cc-pCVTZ:  -1108.47459382731

```

## 2. Optimized CASSCF Geometries and Energies

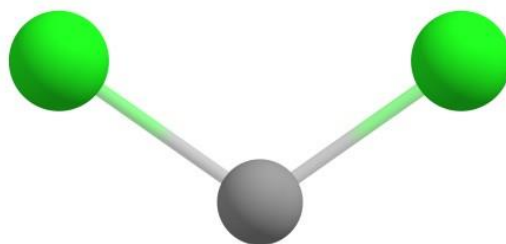

**Figure S15.** Optimized geometry of **11** (in Å) at the CASSCF/cc-pVTZ level of theory. The electronic energies are given in units of  $E_h$ .

|    |             |              |              |
|----|-------------|--------------|--------------|
| 17 | 0.000000000 | -1.405109000 | 0.140662000  |
| 6  | 0.000000000 | 0.000000000  | -0.843814000 |
| 17 | 0.000000000 | 1.405109000  | 0.140662000  |

CASSCF: -956.827423451077  
ZPVE: 2.81 kcal mol<sup>-1</sup>  
NEVPT2: -957.313301720415



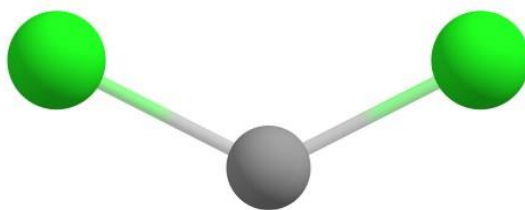

**Figure S16.** Optimized geometry of **31** (in Å) at the CASSCF/cc-pVTZ level of theory. The electronic energies are given in units of  $E_h$ .

|    |             |              |              |
|----|-------------|--------------|--------------|
| 17 | 0.000000000 | -1.506335000 | 0.115982000  |
| 6  | 0.000000000 | 0.000000000  | -0.647158000 |
| 17 | 0.000000000 | 1.506335000  | 0.115982000  |

CASSCF: -956.806399483346  
ZPVE: 2.98 kcal mol<sup>-1</sup>  
NEVPT2: -957.289330172388

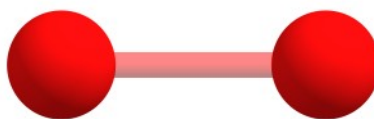

**Figure S17.** Optimized geometry of  ${}^3\text{O}_2$  (in Å) at the CASSCF/cc-pVTZ level of theory. The electronic energies are given in units of  $E_h$ .

|   |             |             |              |
|---|-------------|-------------|--------------|
| 8 | 0.000000000 | 0.000000000 | 0.608010000  |
| 8 | 0.000000000 | 0.000000000 | -0.608010000 |

CASSCF: -149.752032245556

ZPVE: 2.20 kcal mol<sup>-1</sup>

NEVPT2: -150.088923907962

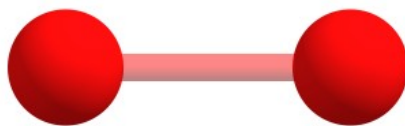

**Figure S18.** Optimized geometry of  ${}^1\text{O}_2$  (in Å) at the CASSCF/cc-pVTZ level of theory. The electronic energies are given in units of  $E_h$ .

|   |             |             |              |
|---|-------------|-------------|--------------|
| 8 | 0.000000000 | 0.000000000 | 0.614507000  |
| 8 | 0.000000000 | 0.000000000 | -0.614507000 |

CASSCF: -149.719366610829

ZPVE: 2.08 kcal mol<sup>-1</sup>

NEVPT2: -150.053439044401

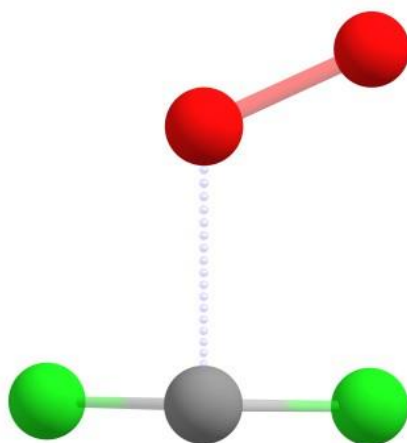

**Figure S19.** Optimized geometry of  ${}^3\text{TS}_{\text{add}}$  (in Å) at the CASSCF/cc-pVTZ level of theory. The electronic energies are given in units of  $E_h$ .

|    |              |              |              |
|----|--------------|--------------|--------------|
| 8  | -2.245280000 | -0.882491000 | -0.194286000 |
| 8  | -1.187897000 | -1.386653000 | 0.165150000  |
| 6  | 0.310889000  | 0.051433000  | 0.531121000  |
| 17 | -0.285754000 | 1.535986000  | -0.043106000 |
| 17 | 1.764547000  | -0.542582000 | -0.130028000 |

CASSCF: -1106.55147855008

ZPVE: 5.83 kcal mol $^{-1}$

NEVPT2: -1107.39137907818

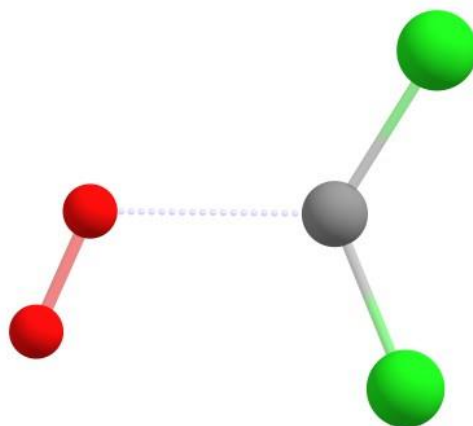

**Figure S20.** Optimized geometry of  ${}^1\text{TS}_{\text{add}}$  (in Å) at the CASSCF/cc-pVTZ level of theory. The electronic energies are given in units of  $E_h$ .

|    |              |              |              |
|----|--------------|--------------|--------------|
| 8  | -2.419085000 | -0.957324000 | -0.039134000 |
| 8  | -1.313948000 | -1.457734000 | 0.059120000  |
| 6  | 0.341264000  | 0.032660000  | 0.208648000  |
| 17 | -0.203814000 | 1.623917000  | 0.029565000  |
| 17 | 1.952089000  | -0.465824000 | 0.070651000  |

CASSCF: -1106.55553268667

ZPVE: 5.82 kcal mol<sup>-1</sup>

NEVPT2: -1107.38358149462

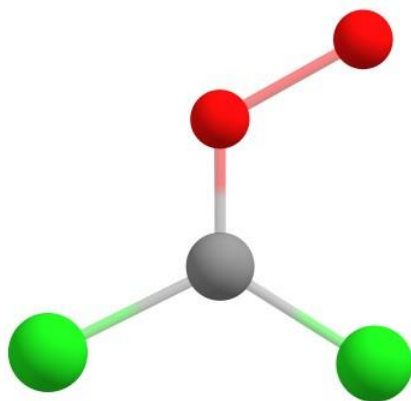

**Figure S21.** Optimized geometry of  ${}^1\text{CI}$  (in Å) at the CASSCF/cc-pVTZ level of theory. The electronic energies are given in units of  $E_h$ .

|    |              |              |             |
|----|--------------|--------------|-------------|
| 8  | -2.143463000 | -0.790068000 | 0.026299000 |
| 8  | -0.810004000 | -1.105773000 | 0.058595000 |
| 6  | 0.038715000  | -0.164780000 | 0.065752000 |
| 17 | -0.387997000 | 1.461088000  | 0.037549000 |
| 17 | 1.673395000  | -0.622465000 | 0.105932000 |

CASSCF: -1106.62425642351

ZPVE: 8.31 kcal mol<sup>-1</sup>

NEVPT2: -1107.46828569791

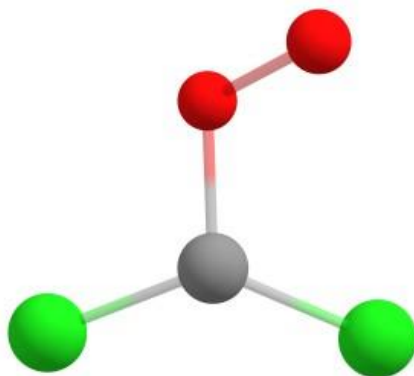

**Figure S22.** Optimized geometry of  ${}^3\text{Cl}_a$  (in Å) at the CASSCF/cc-pVTZ level of theory. The electronic energies are given in units of  $E_h$ .

|    |              |              |              |
|----|--------------|--------------|--------------|
| 8  | -2.089180000 | -0.906571000 | 0.265432000  |
| 8  | -0.862400000 | -1.062000000 | -0.308479000 |
| 6  | 0.004892000  | -0.114777000 | 0.273149000  |
| 17 | -0.313335000 | 1.523088000  | -0.122650000 |
| 17 | 1.622693000  | -0.659273000 | 0.173646000  |

CASSCF: -1106.58661829021  
ZPVE: 7.79 kcal mol<sup>-1</sup>  
NEVPT2: -1107.42541960065

### 3. Energies at Other Levels

**Table S1.** Energies  $\Delta H_0$  at various levels of theory given in units of  $E_h$ .

| method                                       | $^1\text{CCl}_2$ | $^3\text{CCl}_2$ | $^3\text{O}_2$ | $^3\text{TS}_{\text{add}}$ |
|----------------------------------------------|------------------|------------------|----------------|----------------------------|
| PBE/6-311+G(d)                               | -958.004339      | -957.973026      | -150.225984    | —                          |
| PBE/def2-TZVPP                               | -958.018886      | -957.989466      | -150.245317    | -1108.264247               |
| BLYP/def2-TZVPP                              | -958.427761      | -958.394271      | -150.383820    | -1108.808198               |
| PBE0/def2-TZVPP                              | -958.083275      | -958.061778      | -150.231673    | -1108.307507               |
| B3LYP/6-31G(d)                               | -958.379084      | -958.352233      | -150.316261    | -1108.689995               |
| B3LYP/def2-TZVPP                             | -958.462562      | -958.435020      | -150.386034    | -1108.838951               |
| B3LYP(SMD: <i>n</i> -<br>pentane)/def2-TZVPP | -958.463214      | -958.435495      | -150.387606    | -1108.841662               |
| B3LYP-D3/def2-TZVPP                          | -958.462946      | -958.435619      | -150.386035    | -1108.842144               |
| M06-2X/def2-TZVPP                            | -958.384447      | -958.356818      | -150.323160    | -1108.692055               |
| B2PLYP/def2-TZVPP                            | -958.140478      | -958.112029      | -150.295295    | -1108.419910               |
| DSD-PBEP86/def2-TZVPP                        | -957.711185      | -957.683408      | -150.155414    | -1107.848115               |
| CBS-QB3                                      | -957.431235      | -957.397941      | -150.164554    | -1107.585144               |
| G4                                           | -958.140112      | -958.107322      | -150.278657    | -1108.402671               |



#### 4. Correlation of the Oxygen Addition Barrier Heights With the Singlet-Triplet Gaps

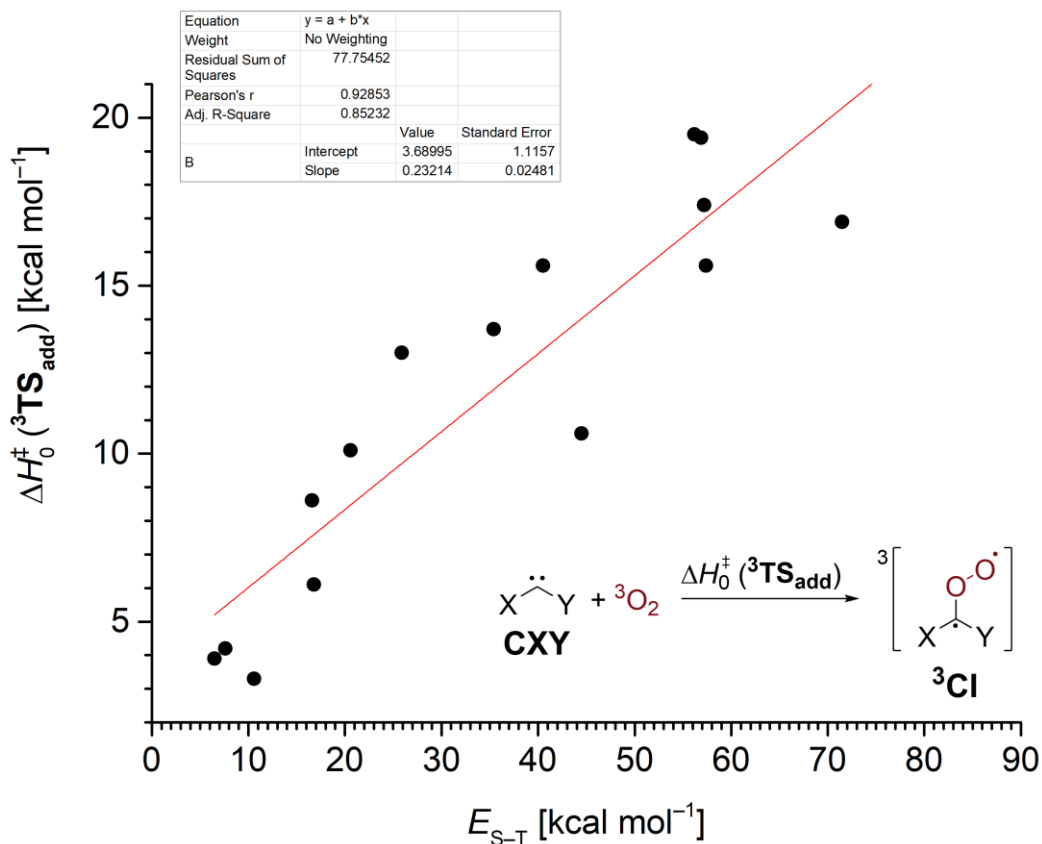

**Figure S23.**  ${}^3\text{O}_2$  addition barriers to various carbenes  $\text{CX-Y}$  at the G4 level as a function of the carbene's singlet-triplet gap.
